# Supplementary material for: Clinical Concept Embeddings Learned from Massive Sources of Multimodal Medical Data
Source: PubMed Central journal article supplement (PMC6922053), 2020
Supplement: NIHMS1061160-supplement-supplemental_data.pdf [file NIHMS1061160-supplement-supplemental_data.pdf]

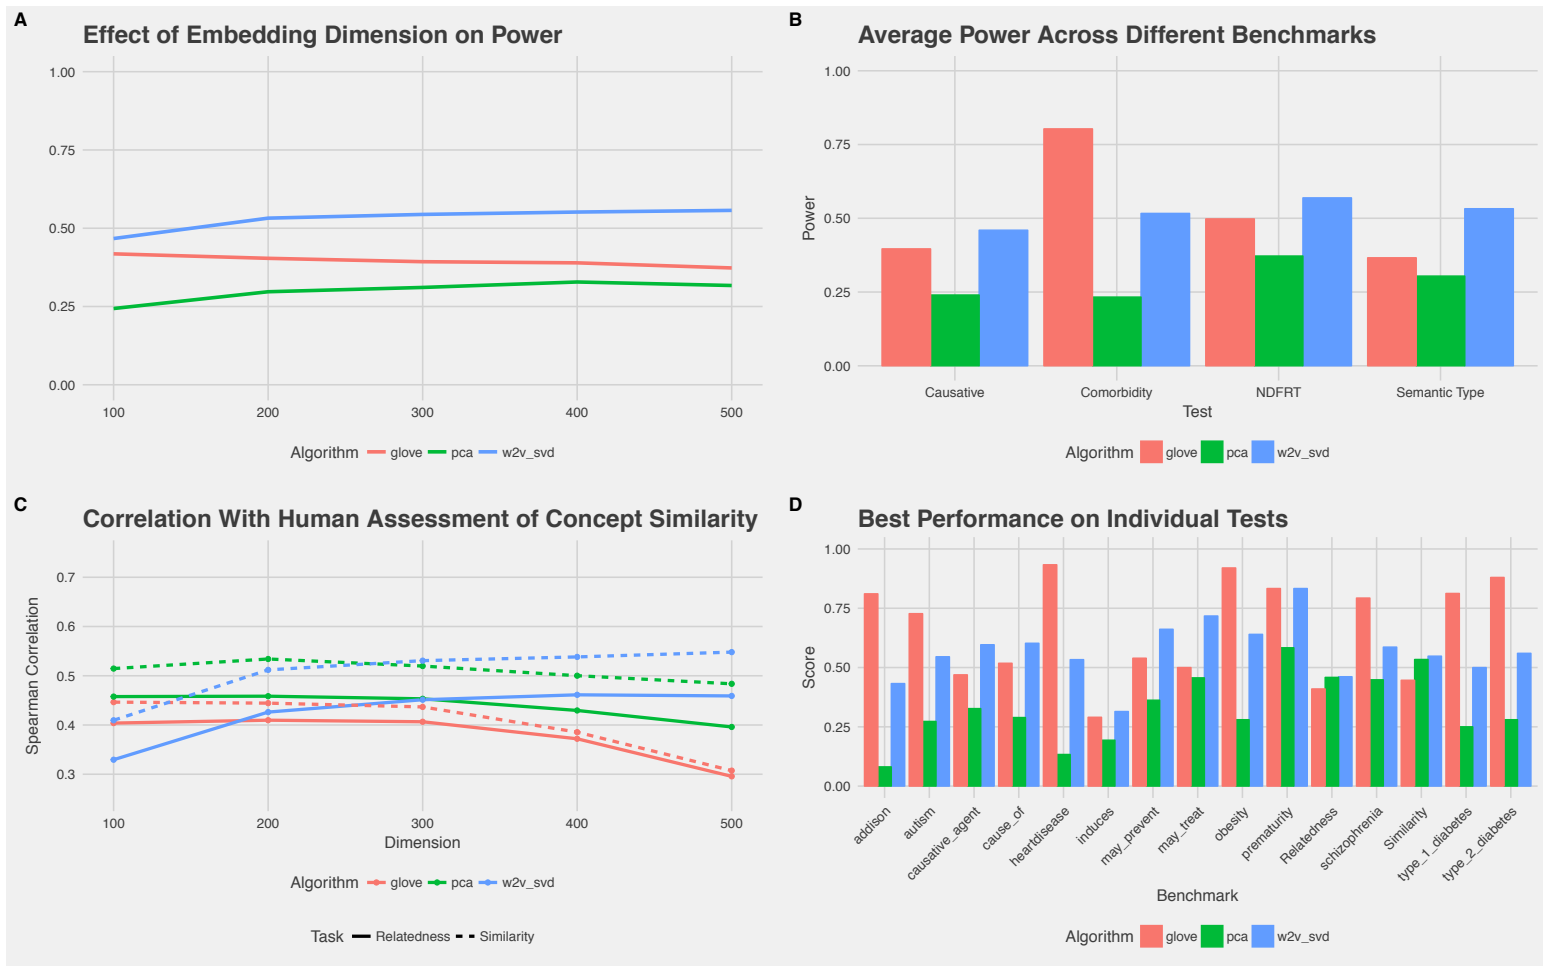

**Supplemental Figure 1:** Results on combined data. **Panel A:** The effect of embedding dimension on statistical power, averaged across benchmarks. **Panel B:** Power for the best configuration for each algorithm across each benchmark category (standard errors show as black bars). **Panel C:** The effect of embedding dimension on spearman correlation between concept-concept cosine similarity with human assessments of similarity and relatedness. **Panel D:** Best performance by each algorithm on individual tests.

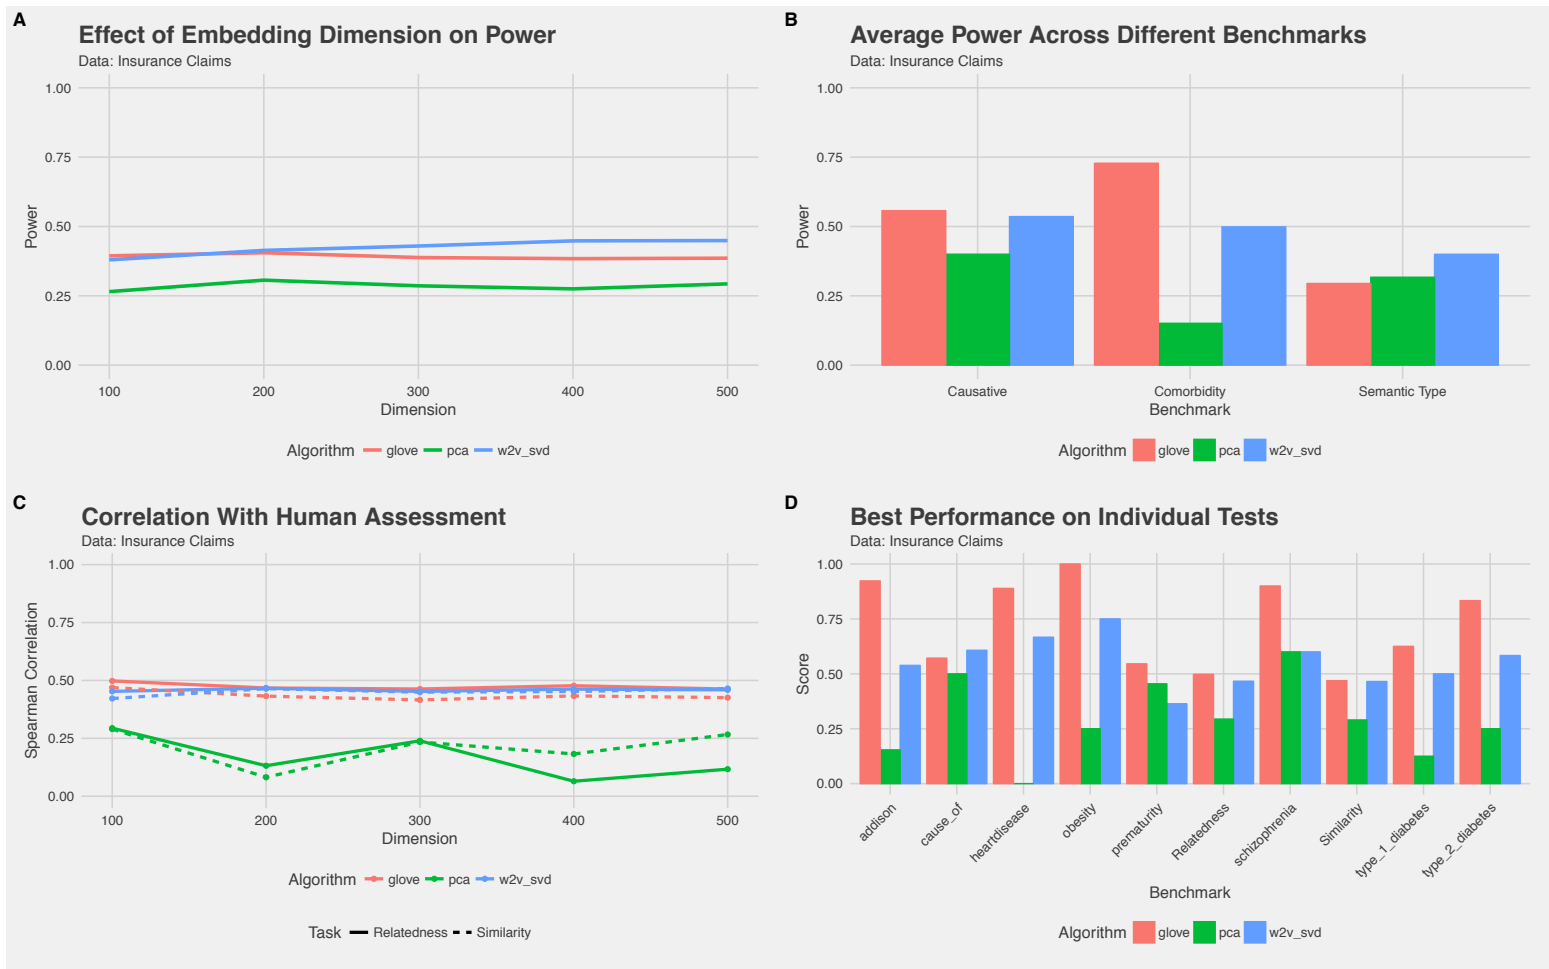

**Supplemental Figure 2:** Results for GloVe, PCA, and word2vec on the insurance claims data.

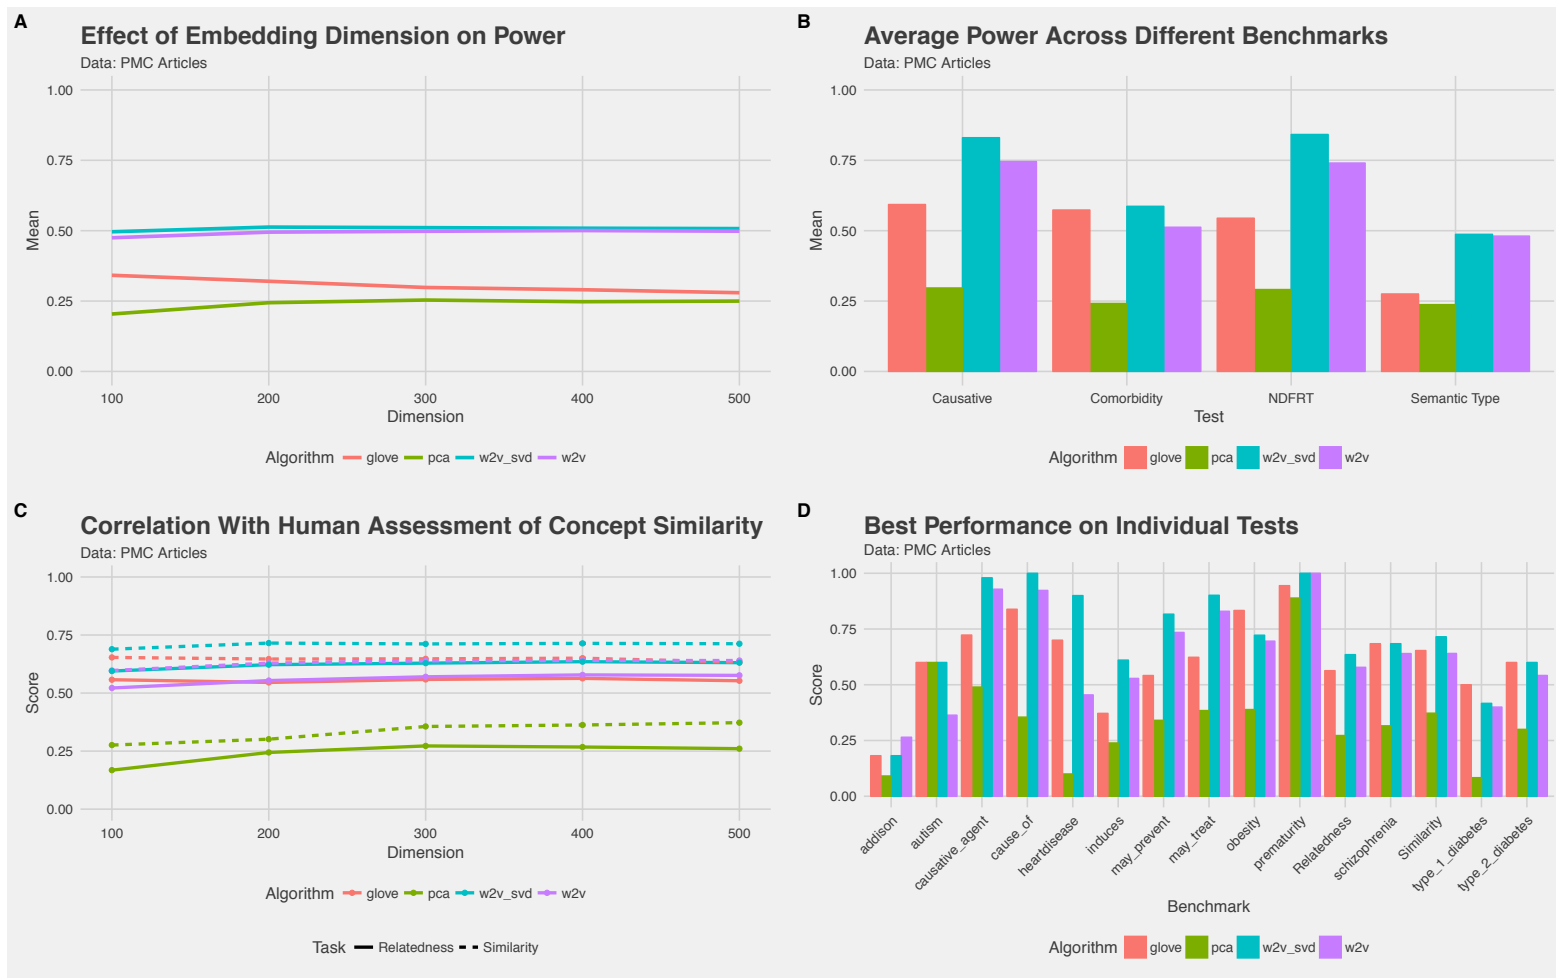

**Supplemental Figure 3:** Results for GloVe, PCA, and word2vec (SVD and original as implemented in the genism package) on the full text articles from PubMed.

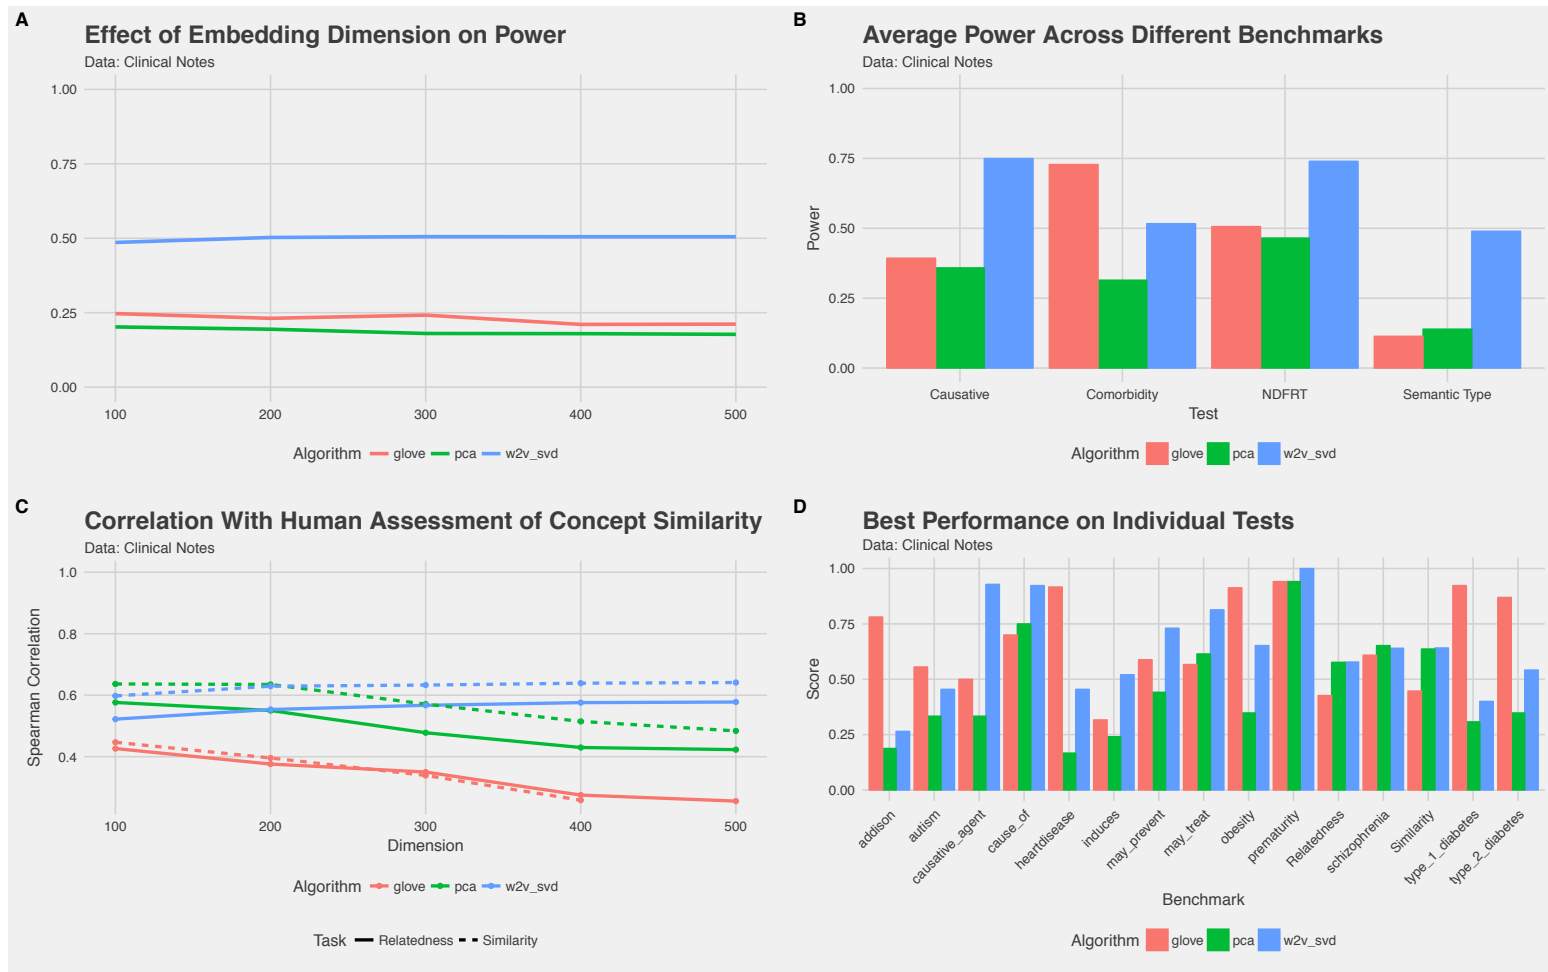

**Supplemental Figure 4:** Results for GloVe, PCA, and word2vec on the Stanford clinical notes data.
